# Supplementary material
Source: publisher figshare collection journal article supplement (https://karger.figshare.com/ndownloader/files/12994919)
Supplement: Supplementary file 1 [file 12994919]

**Supplementary Material**

**Rebers et al. Recall and retention of consent procedure contents and decisions: results of a randomized controlled trial**

**Questionnaire procedure**

Patients were sent a questionnaire approximately six weeks after the intervention. Respondents to this questionnaire were sent a second questionnaire, six months after the intervention. Both questionnaires contained questions about whether respondents remembered that it had been communicated to them that they had control over the use of their tissue, which consent procedure they had experienced and the nature of the procedure, and which action they had taken (e.g., returned the form or no action taken). The first, longer questionnaire also contained questions about whether the respondent remembered receiving or taking the general brochure or receiving the specific brochure. The questionnaire included a copy of the front page of the general brochure of the hospital the patient visited and of the specific brochure to ensure that the patient understood to which materials the questionnaire referred. This questionnaire also contained a question about whether the respondent remembers a conversation with a hospital employee about residual tissue use. There were four options for respondents who remembered a conversation: a conversation with the physician, a nurse, a desk clerk, or a hospital employee with an unknown occupation. Other options were ‘no’ or ‘I don’t know’. Respondents indicating that they remembered a conversation with a desk clerk were excluded from the respondents who indicated remembering the conversation, because it was highly unlikely that such a conversation actually took place. Respondents who chose one of the positive response options completed a follow-up question about whether they remembered being asked during that conversation for permission to use their residual tissue.

**Translation (Dutch-English) of questions discussed in this paper**

**Six-week assessment**

2) Did you receive or take the **general brochure** of the hospital?

- Yes *→ ( continue with question 3 )*
- No *→ ( continue with question 7 )*
- I don’t know *→ ( continue with question 7 )*

7) Did you receive the **specific brochure** about scientific research with residual tissue?

- Yes *→ ( continue with question 8 )*
- No *→ ( continue with question 13 )*
- I don’t know *→ ( continue with question 13 )*

14) Did you talk with an employee of the hospital about scientific research with tissue that is left over after treatment (i.e., surgery) or diagnostic research? (multiple answers possible)

□ Yes, with the physician *→ (continue with question 15 )*

□ Yes, with a nurse *→ (continue with question 15 )*

□ Yes, with a desk clerk *→ (continue with question 15 )*

□ Yes, with a hospital employee, I don’t remember his/her function

*→ (continue with question 15 )*

□ No *→ (continue with question 16 )*

□ I don’t know *→ (continue with question 16 )*

15) During this conversation, were you asked to decide about consenting to future scientific research with your residual tissue?

O Yes, I was asked to decide at that moment

O Yes, I was asked to decide at a later moment

O No

O I don’t know

O Other, namely……………………………………………………………………………………

21) Were you told in the hospital, during a conversation or through a brochure, that you **could decide** whether your residual tissue could be used for scientific research?

O Yes, I was told I could *→ (continue with question 22 )*

O No, I was not told I could *→ (continue with question 31 )*

O I don’t remember *→ (continue with question 31 )*

24) How could you indicate whether your residual tissue could or could not be used for scientific research?

O I did not have to do anything if I agreed to the use; I had to fill in a form if I did not agree to the use. *→ (continue with question 25 )*

O I did not have to do anything if I agreed to the use; I had to tell the physician or nurse if I did not agree to the use.

*→ (continue with question 27 )*

O I had to fill in and return a form with my decision.

*→ (continue with question 29 )*

O I don’t remember *→ ( continue with question 31 )*

25) Did you, or did you not fill in the form to indicate that your tissue could not be used?

O I did not fill in the form *→ (continue with question 26 )*

O I did fill in the form *→ (continue with question 31 )*

O I don’t remember *→ (continue with question 31 )*

26) Why did you not fill in the form? (*multiple answers possible*)

□ I wanted my residual tissue to be used for scientific research.

□ I forgot

□ I had other things on my mind

□ I did not think it was important (enough)

□ I was too ill

□ I was still in doubt

□ Other, namely............................................................................................

*→ ( continue with question 31 )*

27) Did you, or did you not tell your physician or nurse that your residual tissue could not be used?

O I did not tell my physician or nurse *→ (continue with question 28 )*

O I did tell my physician or nurse that my residual tissue could not be used *→ (continue with question 31 )*

O I don’t remember *→ (continue with question 31 )*

28) Why did you not tell your physician or nurse? (*multiple answers possible*)

□ I wanted my residual tissue to be used for scientific research.

□ I forgot

□ I had other things on my mind

□ I did not think it was important (enough)

□ I was too ill

□ I was still in doubt

□ Other, namely............................................................................................

*→ ( continue with question 31 )*

29) Which decision did you indicate on this form?

O I indicated that my residual tissue may be used

*→ ( continue with question 31 )*

O I indicated that my residual tissue may not be used

*→ ( continue with question 31 )*

O I did not fill in the form (yet)

*→ ( continue with question 30 )*

O I don’t remember

*→ ( continue with question 31 )*

30) Why did you not fill in the form (yet)? (*multiple answers possible*)

□ I forgot

□ I had other things on my mind

□ I did not think it was important (enough)

□ I was too ill

□ I was still in doubt

□ Other, namely............................................................................................

**Six-month assessment**

1) Were you told in the hospital, during a conversation or through a brochure, that you **could decide** whether your residual tissue could be used for scientific research?

O Yes, I was told I could *→ (continue with question 2 )*

O No, I was not told I could *→ (continue with question 9 )*

O I don’t remember *→ (continue with question 9 )*

2) How could you indicate whether your residual tissue could or could not be used for scientific research?

O I did not have to do anything if I agreed to the use; I had to fill in a form if I did not agree to the use. *→ (continue with question 3 )*

O I did not have to do anything if I agreed to the use; I had to tell the physician or nurse if I did not agree to the use. *→ (continue with question 5 )*

O I had to fill in and return a form with my decision.

*→ (continue with question 9 )*

O I don’t remember *→ ( continue with question 9 )*

3) Did you, or did you not fill in the form to indicate that your tissue could not be used?

O I did not fill in the form *→ (continue with question 4 )*

O I did fill in the form *→ (continue with question 9 )*

O I don’t remember *→ (continue with question 9 )*

4) Why did you not fill in the form? (*multiple answers possible*)

□ I wanted my residual tissue to be used for scientific research.

□ I forgot

□ I had other things on my mind

□ I did not think it was important (enough)

□ I was too ill

□ I was still in doubt

□ Other, namely............................................................................................

*→ ( continue with question 9 )*

5) Did you, or did you not tell your physician or nurse that your residual tissue could not be used?

O I did not tell my physician or nurse *→ (continue with question 6 )*

O I did tell my physician or nurse that my residual tissue could not be used *→ (continue with question 9 )*

O I don’t remember *→ (continue with question 9 )*

6) Why did you not tell your physician or nurse? (*multiple answers possible*)

□ I wanted my residual tissue to be used for scientific research.

□ I forgot

□ I had other things on my mind

□ I did not think it was important (enough)

□ I was too ill

□ I was still in doubt

□ Other, namely............................................................................................

*→ ( continue with question 9 )*

7) Which decision did you indicate on this form?

O I indicated that my residual tissue may be used

*→ ( continue with question 9 )*

O I indicated that my residual tissue may not be used

*→ ( continue with question 9 )*

O I did not fill in the form (yet)

*→ ( continue with question 8 )*

O I don’t remember

*→ ( continue with question 9 )*

8) Why did you not fill in the form (yet)? (*multiple answers possible*)

□ I forgot

□ I had other things on my mind

□ I did not think it was important (enough)

□ I was too ill

□ I was still in doubt

□ Other, namely............................................................................................

**Full questionnaires (in Dutch)**

**Six-week assessment**

**Consent studie**

## Toelichting bij het invullen van de vragenlijst

De vragenlijst bestaat uit groepjes vragen die over hetzelfde onderwerp gaan. Vóór elk groepje vragen wordt het onderwerp weergegeven in een grijsgekleurd tekstvak. Een voorbeeld ziet u hieronder:

**Onderwerp**

Bij sommige (groepjes) vragen kan meer achtergrondinformatie helpen de vraag te begrijpen en te beantwoorden. Dit soort informatie wordt als volgt weergegeven:

Extra informatie bij een aantal vragen wordt gegeven in een tekstvak zoals deze. Deze informatie helpt u de vragen die eronder staan beter te begrijpen en te beantwoorden. Leest u deze informatie daarom altijd door voordat u deze vragen beantwoordt.

Hier volgen nog een aantal extra aanwijzingen voor het invullen van de vragenlijst:

- Als u wilt, mag u opmerkingen of aanvullingen bij de vragen en antwoorden schrijven.
- Geef steeds één antwoord, tenzij anders staat aangegeven.
- Neem rustig de tijd om de vragen te beantwoorden.
- U bent niet verplicht alle vragen te beantwoorden.
- Als u folders heeft gekregen of gepakt over het gebruik van overgebleven lichaamsmateriaal dan vragen we u deze niet (opnieuw) te lezen voor u de vragenlijst in gaat vullen.
- Als u zich bij het geven van een antwoord vergist, zet dan een kruis door het verkeerde antwoord en kleur het vakje bij het juiste antwoord in:


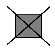
 Het verkeerde antwoord.


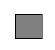
 Het goede antwoord.

**Kwaliteit informatievoorziening**

Hieronder staan een aantal stellingen. We vragen u aan te geven of u denkt dat deze stellingen juist of onjuist zijn. We willen hiermee niet uw kennis testen, maar willen uitzoeken of u op een goede manier geïnformeerd bent over het gebruik van overgebleven lichaamsmateriaal voor wetenschappelijk onderzoek. Daarom vragen we u, mocht u een folder over dit onderwerp hebben, nadrukkelijk om deze folder **niet** (opnieuw) te lezen voordat u de onderstaande vraag beantwoordt.

1) Zijn onderstaande stellingen juist of onjuist?

|  | **juist** | **onjuist** | **weet niet** |
| --- | --- | --- | --- |
| Als een onderzoeker wetenschappelijk onderzoek wil doen met overgebleven lichaamsmateriaal, dan wordt eerst getoetst of het onderzoek belangrijk is. | O | O | O |
| Onderzoekers die overgebleven lichaamsmateriaal gebruiken weten precies van welke personen dit materiaal afkomstig is. | O | O | O |
| Overgebleven lichaamsmateriaal wordt altijd gebruikt in wetenschappelijk onderzoek, de patiënt heeft hier niets over te zeggen. | O | O | O |
| Overgebleven lichaamsmateriaal kan gebruikt worden in onderzoek naar de rol van erfelijkheid in het krijgen van bepaalde ziekten. | O | O | O |

**Schriftelijke informatie over lichaamsmateriaal**

Onder overgebleven lichaamsmateriaal wordt verstaan lichaamsmateriaal dat overgebleven is nadat het verwijderd is voor het stellen van een diagnose of voor de behandeling (bijvoorbeeld een operatie). De patholoog onderzoekt een deel van dit lichaamsmateriaal. Wat er daarna van overblijft wordt in het belang van de patiënt bewaard. Het kan later dienen voor nadere diagnose en behandeling, bijvoorbeeld als de patiënt nogmaals ziek wordt. Er kan met dit overblijvende lichaamsmateriaal ook wetenschappelijk onderzoek worden gedaan.

Onderstaande vragen gaan over de **algemene folder** van het ziekenhuis. In de bijlage bij deze vragenlijst vindt u een afbeelding van de voorkant van deze folder.

2) Heeft u de **algemene folder** van het ziekenhuis gekregen of gepakt?

O Ja *→ ( ga door met vraag 3 )*

O Nee *→ ( ga door met vraag 7 )*

O Ik weet het niet *→ ( ga door met vraag 7 )*

3) Heeft u de informatie over wetenschappelijk onderzoek met overgebleven lichaamsmateriaal in deze folder gelezen?

O Ja, helemaal *→ ( ga door met vraag 4 )*

O Ja, deels *→ ( ga door met vraag 4 )*

O Nee *→ ( ga door met vraag 7 )*

4) Vond u de informatie over overgebleven lichaamsmateriaal in deze folder makkelijk of moeilijk te begrijpen?

O Erg makkelijk

O Makkelijk

O Niet makkelijk, niet moeilijk

O Moeilijk

O Erg moeilijk

5) Wat vond u van de lengte van de informatie over overgebleven lichaamsmateriaal in de folder?

O Te lang

O Precies goed

O Te kort

6) Heeft u informatie over wetenschappelijk onderzoek met overgebleven lichaamsmateriaal gemist in deze folder?

O Ja, nl...................................................................................................................

O Nee

O Ik weet het niet

Onderstaande vragen gaan over de **specifieke folder** over wetenschappelijk onderzoek met
overgebleven lichaamsmateriaal van het ziekenhuis. In de bijlage bij deze vragenlijst vindt u een
afbeelding van de voorkant van deze folder.

7) Heeft u de **specifieke folder** over wetenschappelijk onderzoek met overgebleven lichaamsmateriaal gekregen?

O Ja *→ ( ga door met vraag 8 )*

O Nee *→ ( ga door met vraag 13 )*

O Ik weet het niet *→ ( ga door met vraag 13 )*

8) Heeft u de informatie over wetenschappelijk onderzoek met overgebleven lichaamsmateriaal in deze folder gelezen?

O Ja, helemaal *→ ( ga door met vraag 9 )*

O Ja, deels *→ ( ga door met vraag 9 )*

O Nee *→ ( ga door met vraag 13 )*

9) Vond u de informatie over overgebleven lichaamsmateriaal in deze folder makkelijk of moeilijk te begrijpen?

O Erg makkelijk

O Makkelijk

O Niet makkelijk, niet moeilijk

O Moeilijk

O Erg moeilijk

10) Wat vond u van de lengte van de informatie over overgebleven lichaamsmateriaal in de folder?

O Te lang

O Precies goed

O Te kort

11) Heeft u informatie over wetenschappelijk onderzoek met overgebleven lichaamsmateriaal gemist in deze folder?

O Ja, nl..............................................................................................................................

O Nee

O Ik weet het niet

12) In welke folder, de algemene folder of de specifieke folder, vond u de informatie over overgebleven lichaamsmateriaal beter?

O Ik heb ze niet (allebei) gelezen

O In de algemene folder

O In de specifieke folder

O Ik vond ze allebei even goed/slecht

13) Vindt u dat patiënten in het ziekenhuis een specifieke (uitgebreide) folder over lichaamsmateriaal en wetenschappelijk onderzoek moeten krijgen of moet deze informatie volgens u kort in de algemene folder over de ziekenhuisopname staan?

O Dit moet in een specifieke folder staan

O Dit moet in de algemene folder staan

O Dit moet zowel in een specifieke als in de algemene folder staan

O De patiënt hoeft over lichaamsmateriaal geen schriftelijke informatie te krijgen

O Het maakt mij niet uit in welke folder de informatie staat

O Anders, nl...............................................................................................................

**Mondelinge informatie over lichaamsmateriaal**

14) Heeft u met iemand van het ziekenhuis gesproken over wetenschappelijk onderzoek met lichaamsmateriaal dat is overgebleven na een behandeling (bijvoorbeeld een operatie) of diagnostisch onderzoek? (meerdere antwoorden mogelijk)

□ Ja, met de arts *→ ( ga door met vraag 15 )*

□ Ja, met een verpleegkundige *→ ( ga door met vraag 15 )*

□ Ja, met een baliemedewerker *→ ( ga door met vraag 15 )*

□ Ja, met een ziekenhuismedewerker, weet niet welke functie *→ ( ga door met vraag 15 )*

□ Nee *→ ( ga door met vraag 16 )*

□ Ik weet het niet *→ ( ga door met vraag 16 )*

15) Bent u in dat gesprek gevraagd om te beslissen over het geven van toestemming voor toekomstig wetenschappelijk onderzoek met uw overgebleven lichaamsmateriaal?

O Ja, er is mij gevraagd op dat moment te beslissen

O Ja, er is mij gevraagd op een later moment te beslissen

O Nee

O Ik weet het niet

O Anders, nl……………………………………………………………………………………

16) Had u graag langer met uw arts of met een ziekenhuismedewerker willen spreken over één of meerdere van de volgende onderwerpen? (meerdere antwoorden mogelijk)

□ Uw ziekte, diagnose of behandeling

□ Wetenschappelijk onderzoek met uw overgebleven lichaamsmateriaal

□ Wetenschappelijk onderzoek met speciaal voor dat onderzoek (extra) afgenomen lichaamsmateriaal

□ Een ander onderwerp, namelijk............................................................................

□ Nee, ik had nergens langer over willen spreken

**Het ontvangen van informatie over lichaamsmateriaal**

17) Hieronder staan zes meningen over het ontvangen van **schriftelijke** informatie over overgebleven lichaamsmateriaal. Kunt u aangeven in hoeverre u het met deze meningen eens of oneens bent? Ook als u geen schriftelijke informatie heeft ontvangen of gelezen kunt u deze vraag beantwoorden.

| **Ik vind het ontvangen van schriftelijke informatie...** | **helemaal mee eens** | **mee  eens** | **neutraal** | **mee oneens** | **helemaal mee oneens** |
| --- | --- | --- | --- | --- | --- |
| belangrijk | O | O | O | O | O |
| nuttig | O | O | O | O | O |
| overdreven | O | O | O | O | O |
| onmisbaar voor mijn beslissing | O | O | O | O | O |
| onnodig | O | O | O | O | O |
| belastend | O | O | O | O | O |

18) Hieronder staan zes meningen over het ontvangen van **mondelinge** informatie over overgebleven lichaamsmateriaal. Kunt u aangeven in hoeverre u het met deze meningen eens of oneens bent? Ook als u geen mondelinge informatie heeft ontvangen of gelezen kunt u deze vraag beantwoorden.

| **Ik vind het ontvangen van mondelinge informatie...** | **helemaal mee eens** | **mee  eens** | **neutraal** | **mee oneens** | **helemaal mee oneens** |
| --- | --- | --- | --- | --- | --- |
| belangrijk | O | O | O | O | O |
| nuttig | O | O | O | O | O |
| overdreven | O | O | O | O | O |
| onmisbaar voor mijn beslissing | O | O | O | O | O |
| onnodig | O | O | O | O | O |
| belastend | O | O | O | O | O |

19) Van welke personen had u het goed gevonden als zij u mondeling geïnformeerd hadden over overgebleven lichaamsmateriaal?

| **Ik vind het goed als een ..... mij informeert over overgebleven lichaamsmateriaal** | **helemaal mee eens** | **mee  eens** | **neutraal** | **mee oneens** | **helemaal mee oneens** |
| --- | --- | --- | --- | --- | --- |
| arts | O | O | O | O | O |
| baliemedewerker | O | O | O | O | O |
| verpleegkundige | O | O | O | O | O |

**Beslissen over uw overgebleven lichaamsmateriaal**

20) Wist u, vóórdat u deze vragenlijst invulde, dat het lichaamsmateriaal dat bij u verwijderd is/wordt opgeslagen zou worden?

O Ja, dat wist ik

O Nee, dat wist ik niet

21) Is u in het ziekenhuis, in een gesprek of door middel van een folder, meegedeeld dat u **zelf kon bepalen** of uw overgebleven lichaamsmateriaal voor wetenschappelijk onderzoek gebruikt mocht worden?

O Ja, dit is mij meegedeeld *→ ( ga door met vraag 22 )*

O Nee, dit is mij niet meegedeeld *→ ( ga door met vraag 31 )*

O Ik weet het niet meer *→ ( ga door met vraag 31 )*

22) Heeft u in het ziekenhuis vragen gesteld om beter te kunnen beslissen over toekomstig wetenschappelijk onderzoek met uw overgebleven lichaamsmateriaal?

O Nee

O Ja, nl.............................................................................................................

.....................................................................................................................

In de bijlage bij deze vragenlijst vindt u afbeeldingen van de voorkanten van de **algemene folder** en de **specifieke folder**.

23) Welke bron of bronnen van informatie heeft u gebruikt om te kunnen beslissen over toekomstig wetenschappelijk onderzoek met uw overgebleven lichaamsmateriaal? *(meerdere antwoorden mogelijk)*

□ Ik heb (nog) niet besloten

□ De algemene folder

□ De specifieke folder

□ De mondelinge informatie van de arts of verpleegkundige

□ Ik had geen informatie nodig om te beslissen

□ Een andere bron, namelijk.............................................................................

24) Op welke manier kon u toen aangeven of uw overgebleven lichaamsmateriaal wel of niet voor wetenschappelijk onderzoek gebruikt mocht worden?

O Als het wel gebruikt mocht worden hoefde ik niets te doen; als het niet gebruikt mocht worden moest ik een formulier invullen. *→ ( ga door met vraag 25 )*

O Als het wel gebruikt mocht worden hoefde ik niets te doen; als het niet gebruikt mocht worden moest ik dit aan de arts of verpleegkundige doorgeven.

*→ ( ga door met vraag 27 )*

O Ik moest een formulier met mijn keuze invullen en opsturen.

*→ ( ga door met vraag 29 )*

O Ik weet het niet meer *→ ( ga door met vraag 31 )*

25) Hebt u niets gedaan, of heeft u door middel van het formulier aangegeven dat uw lichaamsmateriaal niet gebruikt mocht worden?

O Ik heb niets gedaan *→ ( ga door met vraag 26 )*

O Ik heb het formulier ingevuld *→ ( ga door met vraag 31 )*

O Ik weet het niet meer *→ ( ga door met vraag 31 )*

26) Waarom hebt u niets gedaan? (*meerdere antwoorden mogelijk*)

□ Ik wilde dat mijn overgebleven lichaamsmateriaal voor wetenschappelijk onderzoek gebruikt zou worden.

□ Ik was het vergeten

□ Ik had andere dingen aan mijn hoofd

□ Ik vond het niet belangrijk (genoeg)

□ Ik was te ziek

□ Ik twijfelde nog

□ Anders, namelijk............................................................................................

*→ ( ga door met vraag 31 )*

27) Hebt u niets gedaan, of heeft u aan uw arts of verpleegkundige doorgegeven dat uw overgebleven lichaamsmateriaal niet gebruikt mocht worden?

O Ik heb niets gedaan *→ ( ga door met vraag 28 )*

O Ik heb aan mijn arts of verpleegkundige doorgegeven dat mijn overgebleven lichaamsmateriaal niet gebruikt mocht worden *→ ( ga door met vraag 31 )*

O Ik weet het niet meer *→ ( ga door met vraag 31 )*

28) Waarom hebt u niets gedaan? (*meerdere antwoorden mogelijk*)

□ Ik wilde dat mijn overgebleven lichaamsmateriaal voor wetenschappelijk onderzoek gebruikt zou worden.

□ Ik was het vergeten

□ Ik had andere dingen aan mijn hoofd

□ Ik vond het niet belangrijk (genoeg)

□ Ik was te ziek

□ Ik twijfelde nog

□ Anders, namelijk............................................................................................

*→ ( ga door met vraag 31 )*

29) Wat hebt u op dit formulier aangegeven?

O Ik heb aangegeven dat mijn overgebleven lichaamsmateriaal gebruikt mag worden

*→ ( ga door met vraag 31 )*

O Ik heb aangegeven dat mijn overgebleven lichaamsmateriaal niet gebruikt mag worden

*→ ( ga door met vraag 31 )*

O Ik heb het formulier (nog) niet ingevuld

*→ ( ga door met vraag 30 )*

O Ik weet het niet meer

*→ ( ga door met vraag 31 )*

30) Waarom hebt u het formulier (nog) niet ingevuld? (*meerdere antwoorden mogelijk*)

□ Ik was het vergeten

□ Ik had andere dingen aan mijn hoofd

□ Ik vond het niet belangrijk (genoeg)

□ Ik was te ziek

□ Ik twijfelde nog

□ Anders, namelijk............................................................................................

31) Als u **nu** voor de keuze zou staan om wel of geen toestemming te geven voor het gebruik van uw overgebleven lichaamsmateriaal voor wetenschappelijk onderzoek, welke keuze zou u dan maken?

O Ik zou geen toestemming geven

O Ik zou toestemming geven

O Ik weet het niet

32) Hieronder staan vijf meningen over het zelf kunnen beslissen of uw overgebleven lichaamsmateriaal voor wetenschappelijk onderzoek gebruikt mag worden. Kunt u aangeven in hoeverre u het met deze meningen eens of oneens bent?

Ook als u niet wist dat u zelf mocht beslissen of als u geen beslissing heeft genomen kunt u deze vraag beantwoorden.

| **Ik vind het zelf kunnen beslissen over mijn overgebleven lichaamsmateriaal...** | **helemaal mee eens** | **mee  eens** | **neutraal** | **mee oneens** | **helemaal mee oneens** |
| --- | --- | --- | --- | --- | --- |
| belangrijk | O | O | O | O | O |
| nuttig | O | O | O | O | O |
| overdreven | O | O | O | O | O |
| onnodig | O | O | O | O | O |
| belastend | O | O | O | O | O |

**Manieren van informeren en toestemming vragen**

33) Hoe goed of slecht vindt u de manier waarop u geïnformeerd bent over wetenschappelijk onderzoek met overgebleven lichaamsmateriaal?

O Zeer goed

O Goed

O Niet goed, niet slecht

O Slecht

O Zeer slecht

Patiënten kunnen zelf beslissen of hun overgebleven lichaamsmateriaal voor wetenschappelijk onderzoek gebruikt mag worden. Patiënten kunnen hierover op verschillende manieren geïnformeerd worden. Ook zijn er verschillende manieren waarop het ziekenhuis de patiënt kan vragen om deze beslissing vast te leggen. Hieronder staan 3 manieren van informeren en van vastleggen:

Manier 1: De patiënt kan de informatie lezen in een folder. Het ziekenhuis gaat er dan vanuit dat de patiënt toestemming geeft, behalve als de patiënt aangeeft dat zijn of haar overgebleven lichaamsmateriaal niet gebruikt mag worden.

Manier 2: De patiënt krijgt de informatie in een gesprek met een arts of verpleegkundige én kan alles nalezen in een speciale folder. Het ziekenhuis vraagt dan elke patiënt na te denken over de keuze en op een formulier aan te geven of hij of zij toestemming geeft.

Manier 3: De patiënt krijgt de informatie in een gesprek met een arts of verpleegkundige én kan alles nalezen in een speciale folder. Het ziekenhuis gaat er dan vanuit dat de patiënt toestemming geeft, behalve als de patiënt aangeeft dat zijn of haar overgebleven lichaamsmateriaal niet gebruikt mag worden.

34) Aan welke manier geeft **u zelf** de voorkeur?

O Manier 1

O Manier 2

O Manier 3

O Ik weet het niet / ik heb geen voorkeur *→ ( ga door met vraag 36 )*

35) Hoe sterk is uw voorkeur voor de manier die u bij vraag 34 aangegeven heeft?

O Ik heb een zeer sterke voorkeur

O Ik heb een sterke voorkeur

O Ik heb een lichte voorkeur

O Ik heb een zeer lichte voorkeur

36) Welke manier is volgens u het beste voor **patiënten in het algemeen**?

O Manier 1

O Manier 2

O Manier 3

O Ik weet het niet

37) Vaak kunnen er meerdere onderzoeken gedaan worden met één stukje overgebleven lichaamsmateriaal. Sommige patiënten willen liever elke keer opnieuw beslissen over ieder nieuw onderzoek dat met hun lichaamsmateriaal gedaan kan worden. Wat wilt u?

O Ik wil toestemming kunnen geven of weigeren voor ieder nieuw onderzoek

O Ik hoef niet iedere keer toestemming te kunnen geven of weigeren

O Anders, nl...............................................................................................................

38) Hoe sterk is uw voorkeur voor de manier van toestemming geven die u bij vraag 37 aangegeven heeft?

O Ik heb een zeer sterke voorkeur

O Ik heb een sterke voorkeur

O Ik heb een lichte voorkeur

O Ik heb een zeer lichte voorkeur

39) Hieronder staan negen soorten wetenschappelijk onderzoek die gedaan zouden kunnen worden met overgebleven lichaamsmateriaal. Als u vooraf kon kiezenvoorwelke soorten onderzoek met overgebleven lichaamsmateriaal u wel of geen toestemming zou geven, zou u dan toestemming geven voor onderstaande soorten onderzoek?

|  | **Ja** | **Nee** | **Ik weet**  **het niet** |
| --- | --- | --- | --- |
| Onderzoek in andere ziekenhuizen in Nederland | O | O | O |
| Onderzoek naar de ziekte die ik heb | O | O | O |
| Commercieel onderzoek (met winstoogmerk) naar betere behandelingen (zoals een nieuw geneesmiddel) | O | O | O |
| Onderzoek waarvoor het ziekenhuis samenwerkt met onderzoekers in het buitenland | O | O | O |
| Commercieel onderzoek (met winstoogmerk) zonder direct behandelingsdoel | O | O | O |
| Onderzoek naar andere ziekten dan de ziekte die ik heb | O | O | O |
| Onderzoek door andere ziekenhuizen in het buitenland | O | O | O |
| Onderzoek waarvoor het ziekenhuis samenwerkt met een commercieel bedrijf (met winstoogmerk) | O | O | O |
| Onderzoek naar erfelijkheid en ziekte | O | O | O |

**Uitspraken**

40) Hieronder staan uitspraken die mensen kunnen doen over lichaamsmateriaal. Kunt u aangeven in hoeverre u het met deze uitspraken eens of oneens bent?

|  | **helemaal eens** | **groten-deels eens** | **noch eens, noch oneens** | **groten-deels oneens** | **helemaal oneens** | **ik weet het niet** |
| --- | --- | --- | --- | --- | --- | --- |
| Wanneer lichaamsmateriaal bij mij is afgenomen, beschouw ik het als iets dat niet meer van mij is | O | O | O | O | O | O |
| Een belangrijk risico van het gebruik van overgebleven lichaamsmateriaal voor wetenschappelijk onderzoek is dat het in verkeerde handen terecht kan komen | O | O | O | O | O | O |
| Ik vertrouw erop dat wetenschappelijk onderzoek met mijn lichaamsmateriaal mijn privacy niet zal schenden | O | O | O | O | O | O |
| Verschillende soorten lichaamsmateriaal (bloed, DNA, ledematen) hebben voor mij dezelfde waarde | O | O | O | O | O | O |
| Onderzoek met lichaamsmateriaal is belangrijk omdat hierdoor belangrijke medische ontdekkingen kunnen worden gedaan | O | O | O | O | O | O |
| Lichaamsmateriaal is mijn eigendom, ook als ik het heb afgestaan | O | O | O | O | O | O |
| Ik ben bang dat het bewaren en gebruiken van mijn overgebleven lichaamsmateriaal mijn privacy in gevaar brengt | O | O | O | O | O | O |
| Het gebruiken van overgebleven lichaamsmateriaal voor wetenschappelijk onderzoek is beter dan dit materiaal weggooien | O | O | O | O | O | O |
| Medisch wetenschappelijk onderzoekers zijn te vertrouwen | O | O | O | O | O | O |
| Het personeel van mijn ziekenhuis is te vertrouwen | O | O | O | O | O | O |
| *ga verder op de volgende bladzijde...* |  |  |  |  |  |  |
|  | **helemaal eens** | **groten-deels eens** | **noch eens, noch oneens** | **groten-deels oneens** | **helemaal oneens** | **ik weet het niet** |
| Ik heb zelf baat gehad van medisch wetenschappelijk onderzoek dat eerder is gedaan | O | O | O | O | O | O |
| Patiënten vandaag profiteren van wetenschappelijk onderzoek met lichaamsmateriaal van eerdere patiënten | O | O | O | O | O | O |
| Een belangrijk risico van het gebruik van overgebleven lichaamsmateriaal is dat er genetische informatie uit gehaald kan worden | O | O | O | O | O | O |
| Het lichaamsmateriaal dat overblijft, is eigenlijk gewoon afval | O | O | O | O | O | O |
| Ik vind dat de genetische informatie in mijn lichaamsmateriaal mijn persoonlijk bezit is | O | O | O | O | O | O |
| Onderzoek met lichaamsmateriaal is belangrijk omdat dit in de toekomst mogelijk een aandoening bij mij of mijn kinderen kan voorkomen | O | O | O | O | O | O |

**Informatie over uw medische situatie**

Wetenschappelijk onderzoek leidt in het algemeen niet tot informatie die relevant is voor de individuen van wie het lichaamsmateriaal gebruikt is. Om die reden ontvangen patiënten in principe geen informatie over hun medische situatie uit wetenschappelijk onderzoek. Toch kan het soms voorkomen dat een onderzoeker informatie (een onverwachte bevinding) uit uw lichaamsmateriaal haalt die u mogelijk zou willen horen. Dit soort persoonlijke medische informatie wordt een ‘onverwachte bevinding’ genoemd.

41) Zou u in de onderstaande gevallen geïnformeerd willen worden over een onverwachte bevinding?

| **Ik wil het graag horen als het gaat om...** | **Ja** | **Nee** | **Ik weet het niet** |
| --- | --- | --- | --- |
| Een behandelbare ziekte | O | O | O |
| Een onbehandelbare ziekte | O | O | O |
| Een grote kans op een ziekte door een genetische oorzaak | O | O | O |
| Een kleine kans op een ziekte door een genetische oorzaak | O | O | O |
| Een verhoogde kans op een ziekte bij mijn kinderen | O | O | O |

42) Als u niet over onverwachte bevindingen geïnformeerd zou worden, zou u dan toestemming geven voor het gebruik van uw overgebleven lichaamsmateriaal voor wetenschappelijk onderzoek?

O Ik zou geen toestemming geven

O Ik zou toestemming geven

O Ik weet het niet

**Wetenschappelijk onderzoek en uw vertrouwen**

43) In Nederland mag wetenschappelijk onderzoek met overgebleven lichaamsmateriaal gedaan worden als de patiënt hiermee instemt en het onderzoek goedgekeurd wordt door een speciale commissie in het ziekenhuis. Hoeveelgarantie biedt dit u dat onderzoek met uw lichaamsmateriaal verantwoord, ethisch en zinvol is?

O Ruim voldoende

O Voldoende

O Niet voldoende, niet onvoldoende

O Onvoldoende

O Ruim onvoldoende

44) Lichaamsmateriaal van patiënten wordt bewaard zodat het eventueel gebruikt kan worden voor diagnose en behandeling als de patiënt opnieuw ziek zou worden. De beheerder van dit materiaal zorgt ervoor dat er altijd materiaal overblijft voor diagnose en behandeling. Hoe bezorgd bent u over de mogelijkheid dat uw lichaamsmateriaal opraakt door wetenschappelijk onderzoek dat er mee gedaan kan worden?

O Helemaal niet bezorgd

O Niet bezorgd

O Niet bezorgd, niet onbezorgd

O Bezorgd

O Erg bezorgd

**Uw lichamelijk functioneren**

45) De volgende vragen gaan over dagelijkse bezigheden. Wordt u door uw gezondheid *op dit moment* beperkt bij deze bezigheden? Zo ja, in welke mate?

|  | **ja, ernstig beperkt** | **ja, een beetje beperkt** | **nee, helemaal niet beperkt** |
| --- | --- | --- | --- |
| *Matige* inspanning zoals het verplaatsen van een tafel, stofzuigen, fietsen | O | O | O |
| *Een paar* trappen oplopen | O | O | O |

**Uw psychische gezondheid**

46) Wilt u het hokje van het antwoord dat het beste bij u past aankruisen?

|  | **altijd** | **heel vaak** | **redelijk vaak** | **soms** | **bijna nooit** | **nooit** |
| --- | --- | --- | --- | --- | --- | --- |
| Hoe vaak gedurende *de afgelopen 4 weken* voelde u zich kalm en rustig? | O | O | O | O | O | O |
| Hoe vaak gedurende *de afgelopen 4 weken* voelde u zich neerslachtig en somber? | O | O | O | O | O | O |

**Uw mening over artsen en medische zorg**

De volgende vragen gaan over dingen die mensen zeggen over hun dokters en de medische zorg die zij krijgen in een ziekenhuis of een (para-)medische praktijk. Leest u iedere vraag zorgvuldig en houdt u rekening met de zorg zoals u die nu krijgt (als u nu geen zorg krijgt van uw dokter denkt u dan aan de zorg die u denkt te krijgen als u die nodig heeft). Wat we willen weten is uw mening, positief of negatief, over de zorg die u hebt ontvangen.

47) Hoe zeer bent u het eens of oneens met de volgende uitspraken?

|  | **helemaal mee eens** | **mee  eens** | **neutraal** | **mee oneens** | **helemaal mee oneens** |
| --- | --- | --- | --- | --- | --- |
| Dokters leggen goed uit waarom een medisch onderzoek nodig is | O | O | O | O | O |
| De medische zorg die ik heb gekregen kan bijna niet beter | O | O | O | O | O |
| Dokters behandelen me te zakelijk en onpersoonlijk | O | O | O | O | O |
| Mijn dokter behandelt mij op een vriendelijke en beleefde wijze | O | O | O | O | O |
| Dokters houden soms geen rekening met wat ik zeg | O | O | O | O | O |
| Ik ben ontevreden over sommige aspecten van de medische zorg die ik heb gekregen | O | O | O | O | O |

**Omgaan met vervelende situaties**

Bij de volgende vragen worden situaties beschreven die u misschien hebt meegemaakt of die u zich goed kunt voorstellen. Iedere situatie wordt gevolgd door enkele uitspraken. Deze betreffen gedachten en ideeën die mensen in zo’n situatie kunnen hebben. De volgende vragen gaan over dit soort situaties. Probeert u zich voor te stellen dat u in zo’n situatie bent en wilt u dan voor iedere uitspraak aangeven in hoeverre deze op u van toepassing is? Er zijn geen goede of foute antwoorden.

U kunt hierbij de volgende leidraad gebruiken:

1 = helemaal niet op mij van toepassing

2 = niet erg op mij van toepassing

3 = enigszins op mij van toepassing

4 = nogal op mij van toepassing

5 = zeer op mij van toepassing

48) Stel, u hebt al enige tijd last van hoofdpijn en duizeligheid. U bent bij de huisarts en deze vertelt u dat hij het niet helemaal vertrouwt en dat u naar de specialist moet voor een nogal vervelend onderzoek.

| Ik neem me voor met spoed te gaan, want ik wil weten wat er aan de hand is. | 1 | 2 | 3 | 4 | 5 |
| --- | --- | --- | --- | --- | --- |
| Ik denk dat het allemaal wel mee zal vallen. | 1 | 2 | 3 | 4 | 5 |
| Ik besluit eerst nog bij andere instanties en dokters te informeren. | 1 | 2 | 3 | 4 | 5 |
| Ik neem mij voor te gaan lezen over hoofdpijn en duizeligheid. | 1 | 2 | 3 | 4 | 5 |
| Ik probeer voorlopig zo min mogelijk aan vervelende dingen te denken. | 1 | 2 | 3 | 4 | 5 |
| Ik maak me niet druk: zo’n onderzoek is minder erg dan steeds hoofdpijn hebben. | 1 | 2 | 3 | 4 | 5 |

49) Stel, u werkt hard en bent veel te zwaar. Uw huisarts heeft al vaker gezegd dat dit onverstandig is. U bent bij hem en hij constateert een te hoge bloeddruk.

| Ik kijk mee op het apparaat om te zien of hij zich niet vergist. | 1 | 2 | 3 | 4 | 5 |
| --- | --- | --- | --- | --- | --- |
| Ik maak me niet al te druk. | 1 | 2 | 3 | 4 | 5 |
| Ik besluit gewoon door te leven. | 1 | 2 | 3 | 4 | 5 |
| Ik vraag uitgebreid naar de verdere gevolgen en risico’s. | 1 | 2 | 3 | 4 | 5 |
| Ik denk bij mezelf: “er zijn ergere kwalen”. | 1 | 2 | 3 | 4 | 5 |
| Ik neem mij voor veel te gaan lezen over een hoge bloeddruk. | 1 | 2 | 3 | 4 | 5 |

50) Stel, u hebt last van uw hart. U bent bij de specialist en hij adviseert een operatie. Hij vertelt dat u er vier maanden op moet wachten en dat niet zeker is of de operatie echt zal helpen.

| Ik ga ervan uit dat de operatie bij mij wel zal helpen. | 1 | 2 | 3 | 4 | 5 |
| --- | --- | --- | --- | --- | --- |
| Ik besluit me zoveel mogelijk in hartoperaties te gaan verdiepen. | 1 | 2 | 3 | 4 | 5 |
| Ik neem me voor de komende maanden zoveel mogelijk plezierige en nuttige dingen te doen. | 1 | 2 | 3 | 4 | 5 |
| Ik ga onderzoeken of er een kans is dat de operatie nadelig uitpakt. | 1 | 2 | 3 | 4 | 5 |
| Ik besluit contact te zoeken met andere patiënten met hetzelfde probleem, voor informatie. | 1 | 2 | 3 | 4 | 5 |
| Ik denk: “het zal allemaal wel meevallen”. | 1 | 2 | 3 | 4 | 5 |

51) Stel, u gaat met niet al te ernstig lijkende darmklachten naar de dokter. Hij constateert een acute blindedarmontsteking en zegt dat u zo snel mogelijk geopereerd moet worden.

| Ik wil precies van hem weten wat ze met me gaan doen. | 1 | 2 | 3 | 4 | 5 |
| --- | --- | --- | --- | --- | --- |
| Ik besluit me nog even te ontspannen voor het zover is. | 1 | 2 | 3 | 4 | 5 |
| Ik vraag me af wat er allemaal mis kan gaan. | 1 | 2 | 3 | 4 | 5 |
| Ik maak me zo min mogelijk druk. | 1 | 2 | 3 | 4 | 5 |
| Ik denk bij mezelf: “het zal wel meevallen”. | 1 | 2 | 3 | 4 | 5 |
| Ik probeer snel nog iemand te bellen die mij iets over deze operatie kan vertellen. | 1 | 2 | 3 | 4 | 5 |

**Uw ziekte of klachten**

De volgende vragen gaan over de ziekte of klachten die u nu heeft (of kort geleden had).

52) Welke diagnose (of uitslag) heeft u van uw arts gekregen? Als de diagnose nog niet bekend is, noteert u dan ‘onbekend’.

...................................................................................................................................................

53) Op welke manier is er voor deze ziekte of klachten lichaamsmateriaal bij u afgenomen? (meerdere antwoorden mogelijk)

□ Door middel van een operatie (er is lichaamsmateriaal weggesneden)

□ Door middel van een biopsie (er is een biopt afgenomen)

□ Er is bloed afgenomen

□ Er is een punctie verricht

□ Anders, namelijk............................................................................................................

□ Ik weet het niet

**Extra lichaamsmateriaal**

De volgende vragen gaan over **extra** afgenomen lichaamsmateriaal. Het gaat hierbij om lichaamsmateriaal dat is afgenomen voor een specifiek wetenschappelijk onderzoek. U kunt bijvoorbeeld gevraagd zijn een extra buisje bloed af te staan.

54) Bent u in het kader van de ziekte of klachten die u **nu** heeft, gevraagd om **extra** lichaamsmateriaal (bijvoorbeeld een buisje bloed) te laten verwijderen of afnemen voor een wetenschappelijk onderzoek? Zo ja, kunt u dan de naam of een korte omschrijving van dit onderzoek geven?

O Ja, namelijk......................................................................................................................

O Nee

O Ik weet het niet

55) Bent u **in het verleden** gevraagd om **extra** lichaamsmateriaal (bijvoorbeeld een buisje bloed) te laten verwijderen of afnemen voor een wetenschappelijk onderzoek? Zo ja, kunt u dan de naam of een korte omschrijving van dit onderzoek geven?

O Ja, namelijk......................................................................................................................

O Nee

O Ik weet het niet

56) Welke soorten lichaamsmateriaal zijn bij u ooit afgenomen voor het stellen van een diagnose, tijdens een behandeling of operatie of voor wetenschappelijk onderzoek? *(meerdere antwoorden mogelijk)*

□ Bloed

□ Urine

□ Speeksel

□ Uitstrijkje

□ Tumor

□ Huid

□ Bot

□ Beenmerg

□ Vetweefsel

□ Cysten

□ Een tand of kies

□ Blinde darm

□ Borstweefsel

□ Placenta

□ Vruchtwater

□ Navelstreng

□ Amandelen

□ Klieren

□ Baarmoeder

□ Voorhuid

□ Iets anders, namelijk........................................................................................................

□ Ik weet het niet

**Uw persoonlijke gegevens**

De volgende vragen gaan over uw persoonlijke gegevens. Het invullen van deze vragen is niet verplicht.

57) Wat is uw geboortejaar? .............................................................................

58) Wat is uw geslacht?

O Vrouw

O Man

59) Wat is of was uw beroep? .............................................................................

60) Werkt u momenteel, bent u werkloos, met pensioen, in de ziektewet of anders?

O Ik werk

O Ik ben werkloos

O Ik ben met pensioen

O Ik zit in de ziektewet

O Ik zit in de WAO/WIA

O Anders, nl .....................................................................................

61) Wat is uw nationaliteit?

O Nederlandse

O Andere, nl......................................................................................

62) Zijn uw beide ouders in Nederland geboren?

O Ja

O Nee, nl...........................................................................................

63) Wat is de hoogste opleiding die u heeft voltooid?

O Lagere school

O Lager beroepsonderwijs (LHNO, LTS)

O Middelbare school (MULO, MAVO)

O Middelbare school (HBS, HAVO, VWO)

O Middelbaar beroepsonderwijs (MBO)

O Hoger beroepsonderwijs (HBO, HEAO)

O Universiteit

O Anders, nl .....................................................................................

64) Wat is uw geloof of levensbeschouwing?

O Katholiek O Protestants

O Islamitisch O Hindoestaan

O Boeddhistisch O Joods

O New Age O Geen

O Anders, nl ..............................................................................................

65) Heeft u kinderen?

O Ja

O Nee

**Tot slot**

66) Als u **nu** voor de keuze zou staan om wel of geen toestemming te geven voor het gebruik van uw overgebleven lichaamsmateriaal voor wetenschappelijk onderzoek, welke keuze zou u dan maken?

O Ik zou geen toestemming geven

O Ik zou toestemming geven

O Ik weet het niet

67) Wilt u de datum invullen waarop u deze vragenlijst invulde? ……….. (datum)

Tot slot willen we u vragen het formulier over het telefonisch interview te lezen en in te vullen. Dit formulier wordt door ons uit deze vragenlijst gehaald en apart opgeslagen. U vindt het formulier op de volgende pagina.

**Ruimte voor opmerkingen over de vragenlijst:**

**HARTELIJK DANK VOOR UW MEDEWERKING**

|

|

|

|

|

|
|
|
|
|
|
|
|
|
|
|
|
|
|
|
|
|
|
|
|
|
|
|
|
|
|
|
|
|
|
|
|
|
|
|
|
|
|
|
|
|
|
|
|

|

###
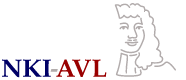


###

### Informatie over een telefonisch interview

We danken u voor uw bereidheid om de vragenlijst in te vullen. Bij enkele vragen zouden we heel graag een toelichting hebben in uw eigen woorden. Daarom vragen wij u of we u telefonisch mogen benaderen voor een korte toelichting op enkele vragen uit de vragenlijst. Het gesprek zal ongeveer 20 minuten duren. We bellen niet iedereen die toestemming geeft daadwerkelijk op.

Het interview kan, indien u daarvoor toestemming geeft, opgenomen worden. Dat maakt mogelijk dat uw antwoorden woordelijk uitgetypt worden zodat we uw mening goed kunnen weergeven. De geluidsopname en uitgetypte tekst worden bij de vragenlijst (gecodeerd) opgeslagen. Anonimiteit is daardoor gewaarborgd.

**Met het verwerken van deze vragenlijst halen we dit formulier uit de vragenlijst en slaan we het apart op.**

**Wilt u hier aangeven of u instemt met een telefonisch interview?**

| O | Ik stem in met een telefonisch interview |
| --- | --- |
| O | Ik stem niet in met een telefonisch interview |

Naam:

Datum:

Handtekening:

Indien u instemt met een telefonisch interview, wilt u dan hieronder aangeven of van dit gesprek een geluidsopname gemaakt mag worden? **Wilt u vervolgens uw telefoonnummer en eventueel de dag en het tijdstip waarop u gebeld wilt worden invullen?**

| O | Het gesprek mag worden opgenomen (uitsluitend ter verwerking van de onderzoeksresultaten) |
| --- | --- |
| O | Het gesprek mag niet worden opgenomen |

Telefoonnummer:

Dag of tijdstip waarop u gebeld wilt worden:

**Six-month assessment**

**Consent studie (2)**

## Toelichting bij het invullen van de vragenlijst

De vragenlijst bestaat uit groepjes vragen die over hetzelfde onderwerp gaan. Vóór elk groepje vragen wordt het onderwerp weergegeven in een grijsgekleurd tekstvak. Een voorbeeld ziet u hieronder:

**Onderwerp**

Bij sommige (groepjes) vragen kan meer achtergrondinformatie helpen de vraag te begrijpen en te beantwoorden. Dit soort informatie wordt als volgt weergegeven:

Extra informatie bij een aantal vragen wordt gegeven in een tekstvak zoals deze. Deze informatie helpt u de vragen die eronder staan beter te begrijpen en te beantwoorden. Leest u deze informatie daarom altijd door voordat u deze vragen beantwoordt.

Hier volgen nog een aantal extra aanwijzingen voor het invullen van de vragenlijst:

- Als u wilt, mag u opmerkingen of aanvullingen bij de vragen en antwoorden schrijven.
- Geef steeds één antwoord, tenzij anders staat aangegeven.
- Neem rustig de tijd om de vragen te beantwoorden.
- U bent niet verplicht alle vragen te beantwoorden.

**Uw beslissing over uw overgebleven lichaamsmateriaal**

Onder overgebleven lichaamsmateriaal wordt verstaan lichaamsmateriaal dat overgebleven is nadat het verwijderd is voor het stellen van een diagnose of voor de behandeling (bijvoorbeeld een operatie). Een deel van dit lichaamsmateriaal wordt door de patholoog onderzocht. Wat er daarna van overblijft wordt in het belang van de patiënt bewaard. Het kan later dienen voor nadere diagnose en behandeling, bijvoorbeeld als de patiënt nogmaals ziek wordt. Er kan met dit overblijvende lichaamsmateriaal ook wetenschappelijk onderzoek worden gedaan.

1) Is u in het ziekenhuis, in een gesprek of door middel van een folder, meegedeeld dat u **zelf kon bepalen** of uw overgebleven lichaamsmateriaal voor wetenschappelijk onderzoek gebruikt mocht worden?

O Ja, dit is mij meegedeeld *→ ( ga door met vraag 2 )*

O Nee, dit is mij niet meegedeeld *→ ( ga door met vraag 9 )*

O Ik weet het niet meer *→ ( ga door met vraag 9 )*

2) Op welke manier kon u toen aangeven of uw overgebleven lichaamsmateriaal wel of niet voor wetenschappelijk onderzoek gebruikt mocht worden?

O Als het wel gebruikt mocht worden hoefde ik niets te doen, als het niet gebruikt mocht worden moest ik een formulier invullen. *→ ( ga door met vraag 3 )*

O Als het wel gebruikt mocht worden hoefde ik niets te doen, als het niet gebruikt mocht worden moest ik dit aan de arts of verpleegkundige doorgeven.

*→ ( ga door met vraag 5 )*

O Ik moest een formulier met mijn keuze invullen en opsturen.

*→ ( ga door met vraag 7 )*

O Ik weet het niet meer *→ ( ga door met vraag 9 )*

3) Hebt u niets gedaan, of heeft u door middel van het formulier aangegeven dat uw lichaamsmateriaal niet gebruikt mocht worden?

O Ik heb niets gedaan *→ ( ga door met vraag 4 )*

O Ik heb het formulier ingevuld *→ ( ga door met vraag 9 )*

O Ik weet het niet meer *→ ( ga door met vraag 9 )*

4) Waarom hebt u niets gedaan? (*meerdere antwoorden mogelijk*)

□ Ik wilde dat mijn overgebleven lichaamsmateriaal voor wetenschappelijk onderzoek gebruikt zou worden.

□ Ik was het vergeten

□ Ik had andere dingen aan mijn hoofd

□ Ik vond het niet belangrijk (genoeg)

□ Ik was te ziek

□ Ik twijfelde nog

□ Anders, namelijk............................................................................................

*→ ( ga door met vraag 9 )*

5) Hebt u niets gedaan, of heeft u aan uw arts of verpleegkundige doorgegeven dat uw overgebleven lichaamsmateriaal niet gebruikt mocht worden?

O Ik heb niets gedaan *→ ( ga door met vraag 6 )*

O Ik heb aan mijn arts of verpleegkundige doorgegeven dat mijn overgebleven lichaamsmateriaal niet gebruikt mocht worden *→ ( ga door met vraag 9 )*

O Ik weet het niet meer *→ ( ga door met vraag 9 )*

6) Waarom hebt u niets gedaan? (*meerdere antwoorden mogelijk*)

□ Ik wilde dat mijn overgebleven lichaamsmateriaal voor wetenschappelijk onderzoek gebruikt zou worden.

□ Ik was het vergeten

□ Ik had andere dingen aan mijn hoofd

□ Ik vond het niet belangrijk (genoeg)

□ Ik was te ziek

□ Ik twijfelde nog

□ Anders, namelijk............................................................................................

*→ ( ga door met vraag 9 )*

7) Wat hebt u op dit formulier aangegeven?

O Ik heb aangegeven dat mijn overgebleven lichaamsmateriaal gebruikt mag worden

*→ ( ga door met vraag 9 )*

O Ik heb aangegeven dat mijn overgebleven lichaamsmateriaal niet gebruikt mag worden

*→ ( ga door met vraag 9)*

O Ik heb het formulier (nog) niet ingevuld

*→ ( ga door met vraag 8 )*

O Ik weet het niet meer

*→ ( ga door met vraag 9 )*

8) Waarom hebt u het formulier (nog) niet ingevuld? (*meerdere antwoorden mogelijk*)

□ Ik was het vergeten

□ Ik had andere dingen aan mijn hoofd

□ Ik vond het niet belangrijk (genoeg)

□ Ik was te ziek

□ Ik twijfelde nog

□ Anders, namelijk............................................................................................

9) Als u vandaag zou mogen kiezen of uw overgebleven lichaamsmateriaal voor wetenschappelijk onderzoek gebruikt zou mogen worden, welke keuze zou u dan maken?

O Mijn overgebleven lichaamsmateriaal zou gebruikt mogen worden

O Mijn overgebleven lichaamsmateriaal zou **niet** gebruikt mogen worden

O Ik weet het niet

**Toestemming: eenmalig of voor elk nieuw onderzoek**

Op dit moment is het zo dat patiënten eenmalig om toestemming wordt gevraagd voor het gebruik van hun overgebleven lichaamsmateriaal. Een andere mogelijkheid is om patiënten voor elk nieuw onderzoek toestemming te vragen. Dit zou betekenen dat het ziekenhuis ook na uw behandeling af en toe contact kan opnemen om u om toestemming te vragen om uw overgebleven lichaamsmateriaal voor een nieuw onderzoek te gebruiken.

10) Wat zou u ervan vinden als u vandaag om toestemming gevraagd zou worden voor een nieuw onderzoek met uw overgebleven lichaamsmateriaal?

| **Als ik vandaag om toestemming zou worden gevraagd, dan vind ik dat...** | **helemaal mee eens** | **mee  eens** | **neutraal** | **mee oneens** | **helemaal mee oneens** |
| --- | --- | --- | --- | --- | --- |
| belangrijk | O | O | O | O | O |
| nuttig | O | O | O | O | O |
| overdreven | O | O | O | O | O |
| onnodig | O | O | O | O | O |
| belastend | O | O | O | O | O |
| confronterend | O | O | O | O | O |
| prima | O | O | O | O | O |
| vervelend | O | O | O | O | O |

**Informatie over uw medische situatie**

Wetenschappelijk onderzoek leidt in het algemeen niet tot informatie die relevant is voor de individuen van wie het lichaamsmateriaal gebruikt is. Om die reden ontvangen patiënten in principe geen informatie over hun medische situatie uit wetenschappelijk onderzoek. Toch kan het soms voorkomen dat een onderzoeker informatie (een onverwachte bevinding) uit uw lichaamsmateriaal haalt die u mogelijk zou willen horen. Dit soort persoonlijke medische informatie wordt een ‘onverwachte bevinding’ genoemd.

11) Stel onderzoekers zouden vandaag zo’n onverwachte bevinding uit uw overgebleven lichaamsmateriaal halen. Zou u de onderstaande soorten informatie (onverwachte bevindingen) op dit moment willen horen?

| **Ik wil het graag horen als het gaat om...** | **Ja** | **Nee** | **Ik weet het niet** |
| --- | --- | --- | --- |
| Een behandelbare ziekte | O | O | O |
| Een onbehandelbare ziekte | O | O | O |
| Een grote kans op een ziekte door een genetische oorzaak | O | O | O |
| Een kleine kans op een ziekte door een genetische oorzaak | O | O | O |
| Een verhoogde kans op een ziekte bij mijn kinderen | O | O | O |

Er zijn verschillende manieren om patiënten over onverwachte bevindingen te informeren. Hieronder staan twee manieren:

Manier 1: Een onderzoeker of arts neemt contact met u op als er iets gevonden is. Een arts bepaalt dan of de bevinding relevant voor u is of niet. U hoeft zelf geen actie te ondernemen.

Manier 2: U kunt zelf, bijvoorbeeld via een website op internet, opzoeken in welke wetenschappelijke onderzoeken uw overgebleven lichaamsmateriaal gebruikt is. U kunt dan zelf beslissen of u wilt weten of er in één of meerdere van deze onderzoeken iets gevonden is.

12) Hoe goed of slecht vindt u deze twee manieren?

|  | **Zeer goed** | **Goed** | **Niet goed, niet slecht** | **Slecht** | **Zeer slecht** |
| --- | --- | --- | --- | --- | --- |
| Manier 1 | O | O | O | O | O |
| Manier 2 | O | O | O | O | O |

**Tot slot**

13) Wilt u de datum invullen waarop u deze vragenlijst invulde? ……….. (datum)

**Ruimte voor opmerkingen:**

**HARTELIJK DANK VOOR UW MEDEWERKING**
